# Supplementary material for: Tracing the Origin of Planktonic Protists in an Ancient Lake
Source: MDPI journal article supplement (doi:10.3390/microorganisms8040543), 2020-04-09
Supplement: s1 [file s1]

Monodofilosa

Cryomonadida

Thecofilosea

Mataza-like

Thaumatomonadida

Cercomonadida

Sarcomonadea

Pansomonadida

Glissomonadida

Novel Clade 10

Endomixa

Spongomonadida

Tremulida

Granofilosea

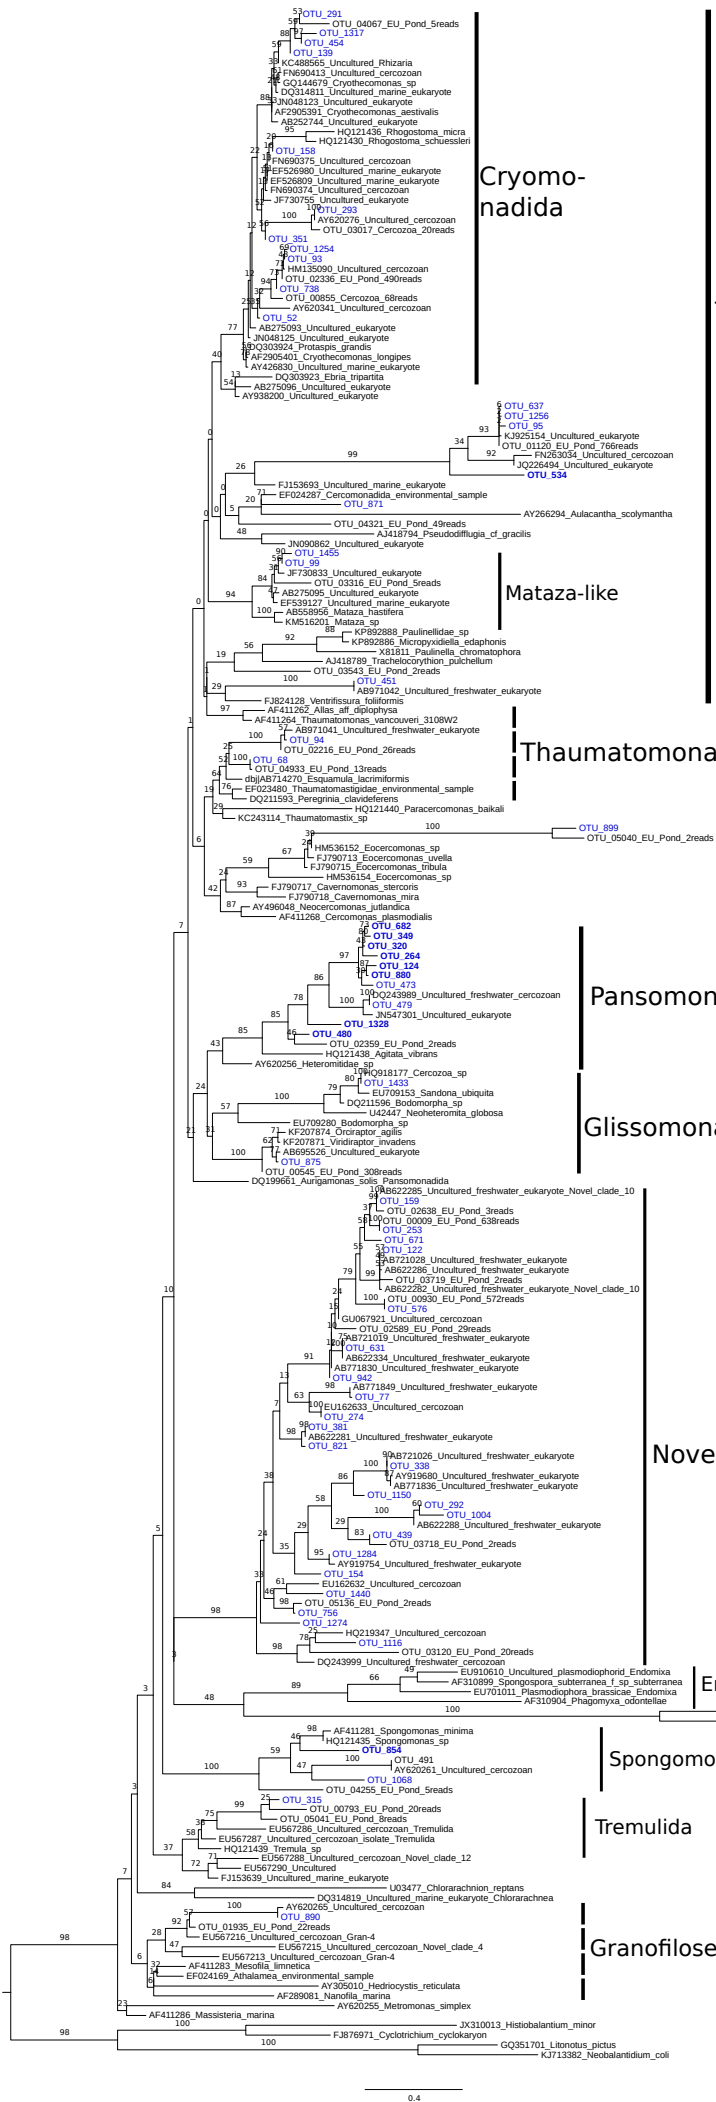

0.4
