# Supplementary figures and images for: Tracing the Origin of Planktonic Protists in an Ancient Lake
Source: MDPI journal article supplement (doi:10.3390/microorganisms8040543), 2020-04-09

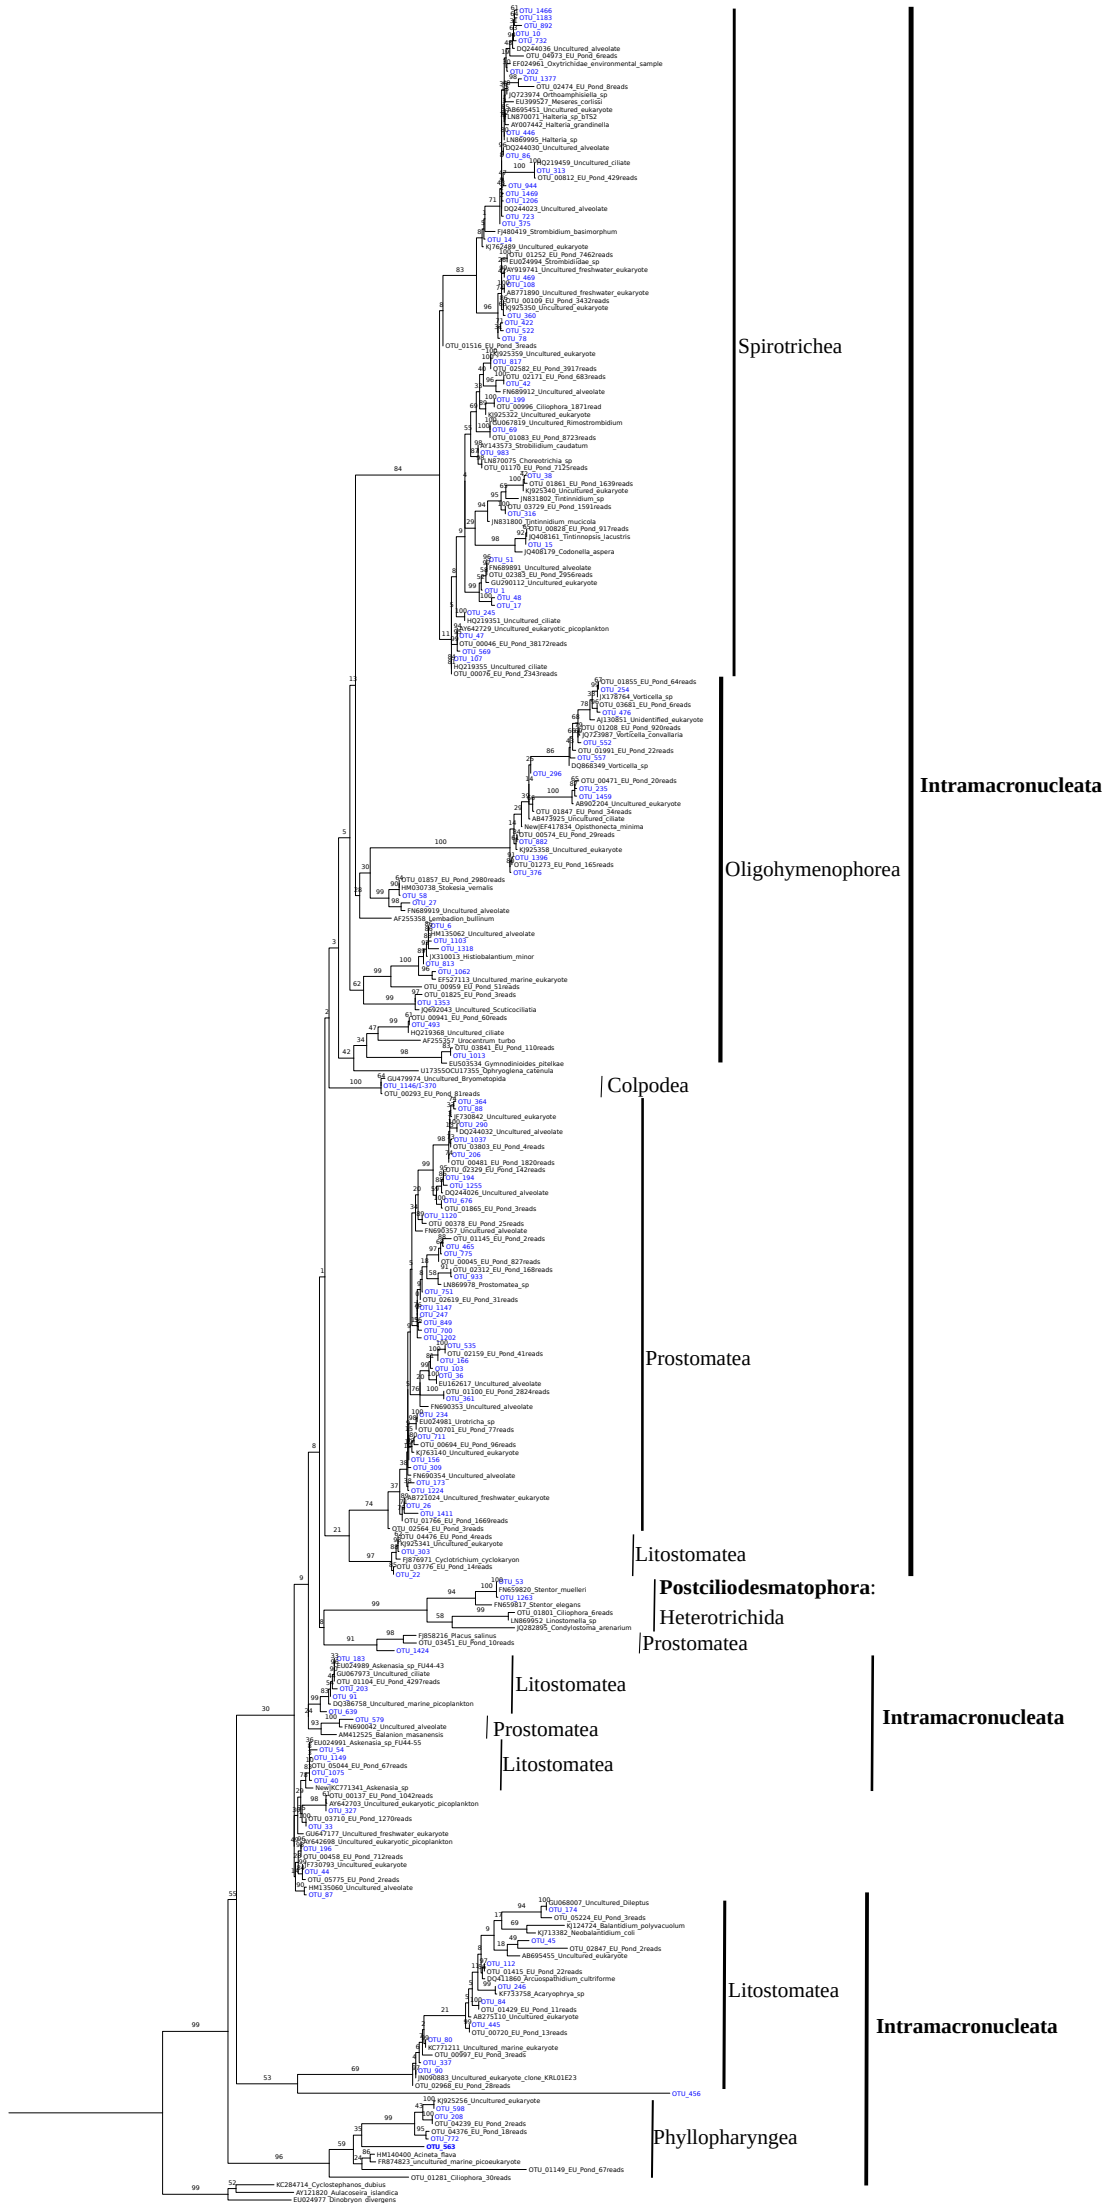

Supplement: s1 [file s1]

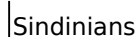

Supplement: s1 [file s1]

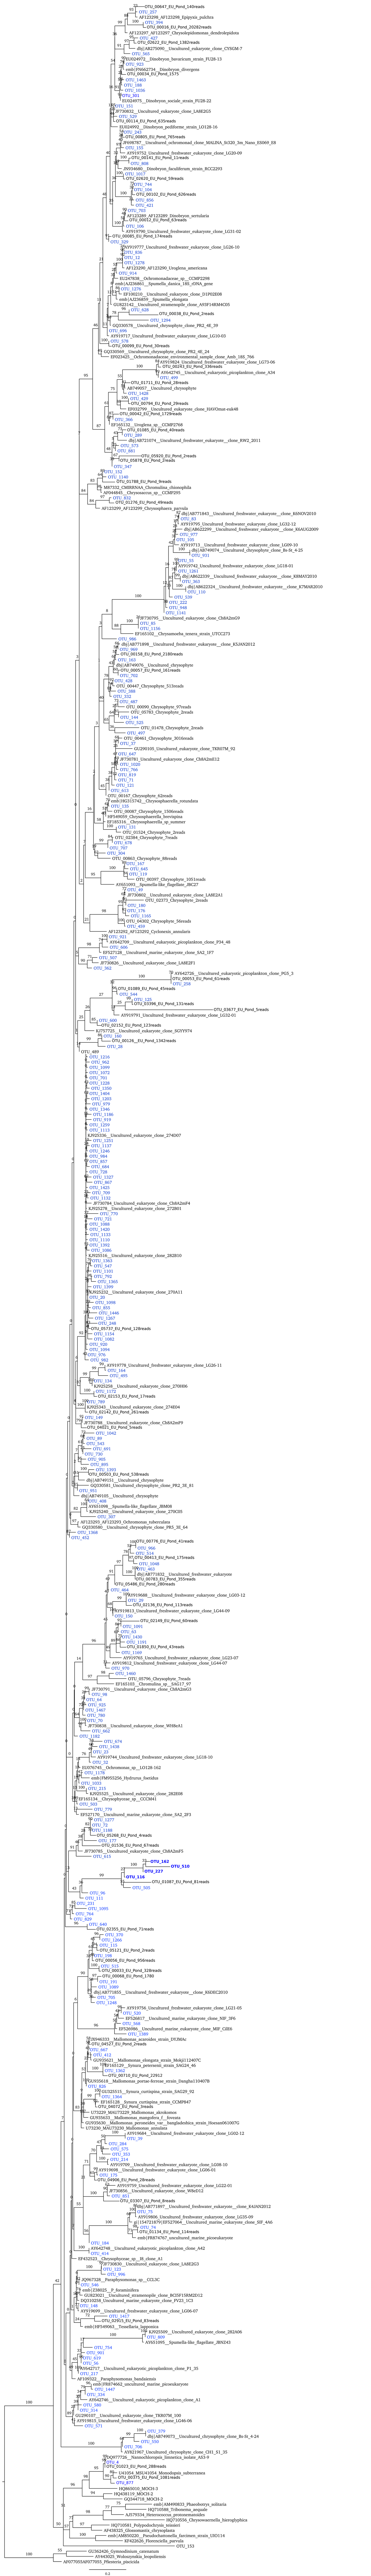

Supplement: s1 [file s1]

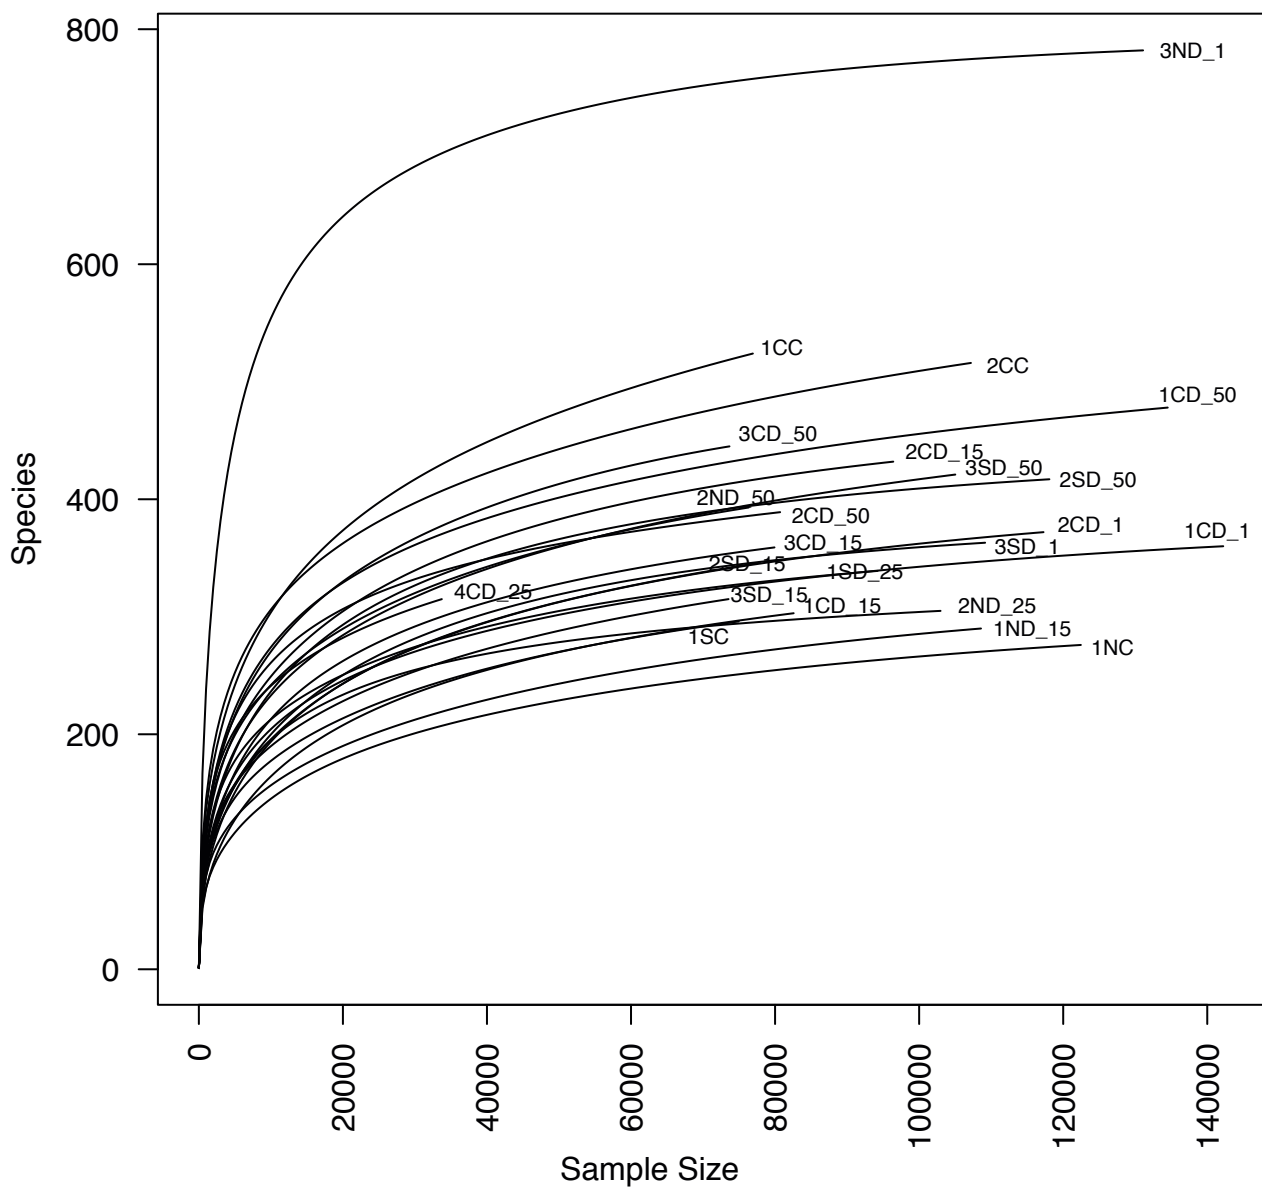

Supplement: s1 [file s1]

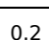

Supplement: s1 [file s1]

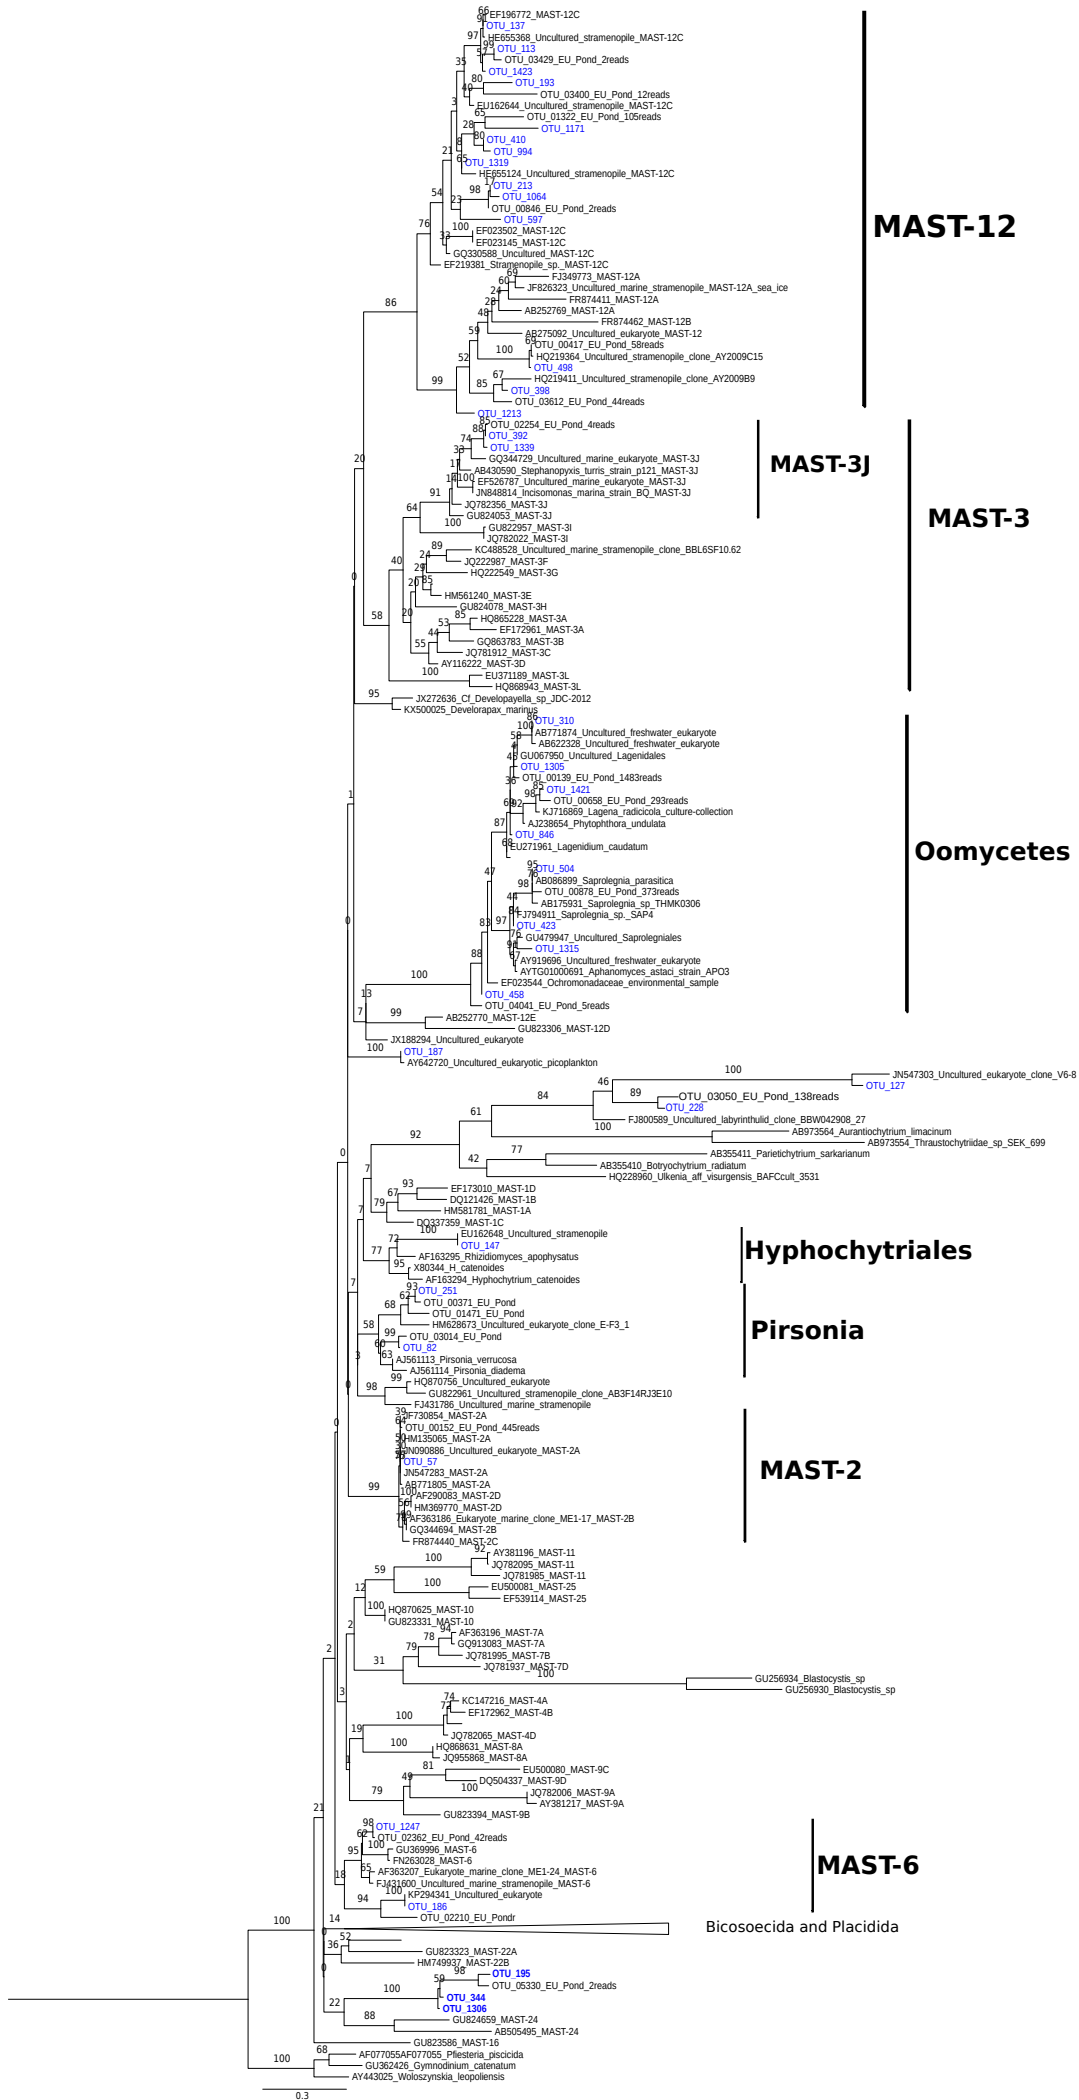

Supplement: s1 [file s1]
